# Supplementary material
Source: PubMed Central journal article supplement (PMC4528508)
Supplement: rspb20150610supp1.pdf [file rspb20150610supp1.pdf]

1 Electronic supplementary material (ESM)

2

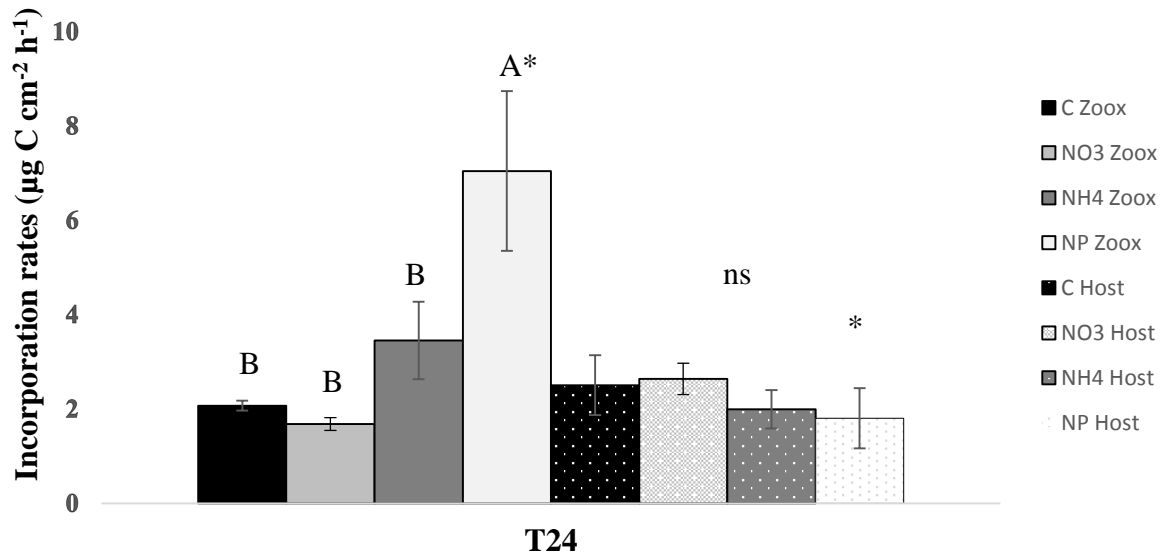

3

4 **ESM 1.** Significant interaction were observed between “Nutrient treatment” and “Coral  
5 Compartment” for the carbon incorporation rates (ANOVA,  $p < 0.001$ ). After 24h, NP treatment  
6 presented the highest symbiont incorporation rates, ca.  $7.01 \mu\text{g C cm}^{-2} \text{h}^{-1}$  (Tukey HSD,  $p < 0.01$ ),  
7 while no significant differences were observed between host and symbionts for the three other  
8 treatments (Tukey-HSD,  $p > 0.05$ ). Stars indicate significant differences between incorporation  
9 rates in symbionts and host. Data are presented as mean  $\pm$  SE.

10

11

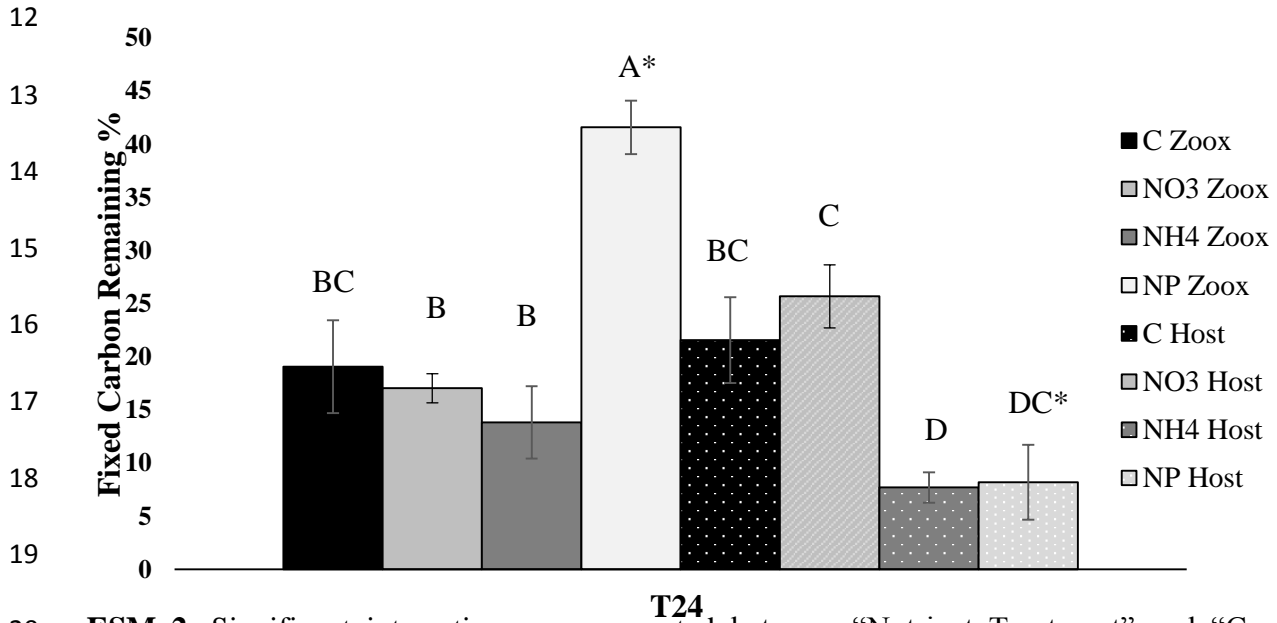

ESM 2. Significant interactions were reported between “Nutrient Treatment” and “Coral Compartment” for the percentage of fixed carbon remaining after 24h (ANOVA,  $p < 0.001$ ). NP-enriched nubbins fixed a higher percentage of carbon in symbiont tissues than in the other treatments (Tukey HSD,  $p < 0.002$ ). Percentages of fixed carbon remaining in host tissues was higher in  $\text{NO}_3$ -enriched corals than in the ammonium-enriched nubbins (Tukey HSD,  $p < 0.05$ ). Data are presented as mean  $\pm$  SE.

26

27

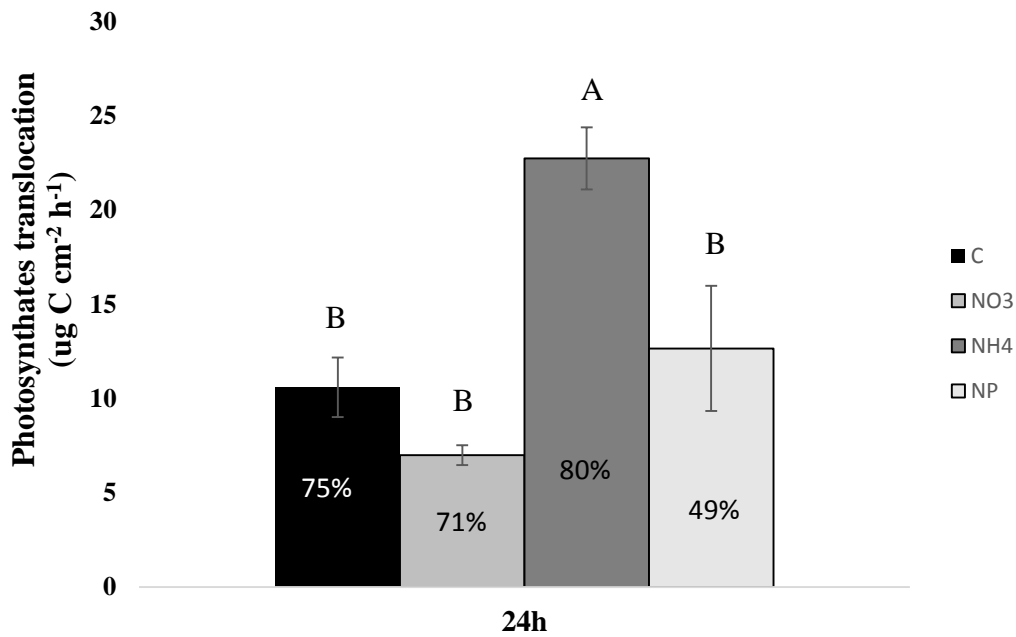

28

29 **ESM 3.** NH<sub>4</sub> enrichment greatly increased the amount of photosynthates transferred to the host  
 30 after 24h compared to the other treatments, ca. 22 ug C cm<sup>-2</sup> h<sup>-1</sup> (Tukey HSD, p<0.006). Finally,  
 31 NP-enriched nubbins showed middle values of photosynthates translocation, between those of  
 32 the control and the NH<sub>4</sub>-enriched treatments. After 24h, NP condition presented a lower  
 33 percentage of translocation than control and NH<sub>4</sub>-enriched corals, which maintain similar  
 34 values, between 75 and 80%, against 49% in NP treatment (Tukey HSD, p<0.05). Data are  
 35 presented as mean ± SE.

36

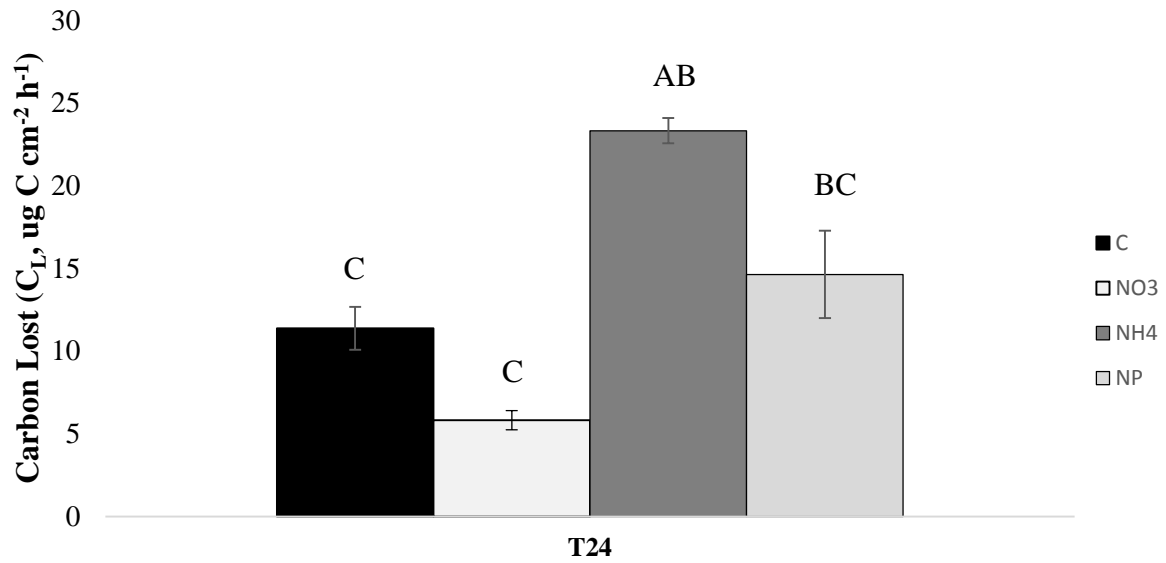

37 **ESM 4.** After 24h, NH<sub>4</sub>-enriched nubbins exhibited the highest  $C_L$ , ca.  $23.3 \mu\text{g C cm}^{-2} \text{h}^{-1}$  than  
 38 control and NO<sub>3</sub>-enriched corals (Tukey HSD,  $p < 0.03$ ). No significant differences were  
 39 observed for the percentages of carbon lost within the treatments (ANOVA,  $p > 0.05$ ). Data are  
 40 presented as mean  $\pm$  SE.

41

42

43 **ESM 5a.** Results of the analyses of variance (ANOVA) for the following different  
 44 physiological response variables. P-values are considered significant for  $p < \alpha$  and  $\alpha = 0.05$

| <b>Factor</b>                                                                              | <b>Df</b> | <b>P-value</b>       | <b>F-value</b> |
|--------------------------------------------------------------------------------------------|-----------|----------------------|----------------|
| <b><i>Symbionts density (zoox cm<sup>-2</sup>)</i></b>                                     |           |                      |                |
| Nutrient Treatment                                                                         | 3         | <b>&lt;0.0000001</b> | 44.29          |
| <b><i>Chlorophyll content (µg Chl(a+c<sub>2</sub>) cm<sup>-2</sup>)</i></b>                |           |                      |                |
| Nutrient Treatment                                                                         | 3         | <b>&lt;0.000001</b>  | 17.39          |
| <b><i>Protein concentration (mg cm<sup>-2</sup>)</i></b>                                   |           |                      |                |
| Nutrient Treatment                                                                         | 3         | <b>&lt;0.0001</b>    | 14.15          |
| <b><i>Gross photosynthesis (µmoles O<sub>2</sub> h<sup>-1</sup> zoox<sup>-1</sup>)</i></b> |           |                      |                |
| Nutrient Treatment                                                                         | 3         | <b>&lt;0.001</b>     | 31.43          |
| <b><i>Calcification rate (µg C cm<sup>-2</sup>h<sup>-1</sup>)</i></b>                      |           |                      |                |
| Nutrient Treatment                                                                         | 3         | <b>&lt;0.001</b>     | 13.52          |

45

46

47

48

49 **ESM 5b.** Results of the analysis of variance (ANOVA) for the different response variables  
 50 tested during the <sup>13</sup>C labelling experiment after 5h incubation in <sup>13</sup>C and a chase of 24h. P-  
 51 values are considered significant for p<α and α=0.05.

52

| <b>Factor</b>                                                                                             | <b>Df</b> | <b>P-value<br/>After 24h</b> | <b>F-value</b> |
|-----------------------------------------------------------------------------------------------------------|-----------|------------------------------|----------------|
| <b><i>Incorporation rate (ρ)</i></b>                                                                      |           |                              |                |
| Nutrient Treatment                                                                                        | 3         | <b>0.03</b>                  | 6.03           |
| Coral Compartment                                                                                         | 1         | 0.11                         | 7.57           |
| Nutrient Treatment * Coral Compartment                                                                    | 3         | <b>&lt;0.001</b>             | 10.19          |
| <b><i>Fixed carbon remaining (C<sub>R</sub>)</i></b>                                                      |           |                              |                |
| Nutrient Treatment                                                                                        | 3         | <b>0.03</b>                  | 6.1            |
| Coral Compartment                                                                                         | 1         | 0.05                         | 9.66           |
| Nutrient Treatment * Coral Compartment                                                                    | 3         | <b>&lt;0.001</b>             | 22.25          |
| <b><i>Amount of carbon lost (C<sub>L</sub> in ug C cm<sup>-2</sup>)</i></b>                               |           |                              |                |
| Nutrient Treatment                                                                                        | 3         | <b>0.003</b>                 | 22.49          |
| <b><i>Percent of carbon lost (C<sub>L</sub> in %)</i></b>                                                 |           |                              |                |
| Nutrient Treatment                                                                                        | 3         | 2.72                         | 1.562          |
| <b><i>Amount of photosynthate translocated (T<sub>s</sub> in ug C cm<sup>-2</sup> h<sup>-1</sup>)</i></b> |           |                              |                |
| Nutrient Treatment                                                                                        | 3         | <b>&lt;0.0001</b>            | 40.42          |
| <b><i>Percent of photosynthate translocated (T<sub>s</sub> in %)</i></b>                                  |           |                              |                |
| Nutrient Treatment                                                                                        | 3         | <b>0.028</b>                 | 9.5            |
| <b><i>Gross photosynthesis (PgC) (μg C cm<sup>-2</sup>h<sup>-1</sup>)</i></b>                             |           |                              |                |
| Nutrient Treatment                                                                                        | 3         | <b>&lt;0.0001</b>            | 26.38          |
| <b><i>Holobiont respiration (R<sub>c</sub>)(μg C cm<sup>-2</sup>h<sup>-1</sup>)</i></b>                   |           |                              |                |
| Nutrient Treatment                                                                                        | 3         | <b>&lt;0.001</b>             | 16.08          |
| <b><i>Symbiont respiration (R<sub>s</sub>)(μg C cm<sup>-2</sup>h<sup>-1</sup>)</i></b>                    |           |                              |                |
| Nutrient Treatment                                                                                        | 3         | <b>&lt;0.0001</b>            | 24.52          |
| <b><i>Host respiration (R<sub>h</sub>)(μg C cm<sup>-2</sup>h<sup>-1</sup>)</i></b>                        |           |                              |                |
| Nutrient Treatment                                                                                        | 3         | <b>&lt;0.001</b>             | 11.56          |
